# Supplementary material for: An unusual three-dimensional Dy–Cd2 framework exhibiting single-ion magnet behavior
Source: Royal Society of Chemistry journal article supplement (doi:10.1039/c5dt00721f), 2015-01-01
Supplement: c5dt00721f1.pdf [file c5dt00721f1.pdf]

## Supporting Information for

# An unusual three-dimensional Dy-Cd<sub>2</sub> Framework exhibiting single-ion magnet behavior

Xue-Jing Zhang, Ke Liu, Yan-Min Bing, Na Xu\*, Wei Shi and Peng Cheng\*

**Materials and General Characterization.** All chemicals applied were of reagent grade and used as received without further refinement. Elemental analyses for C, H and N were performed on a Perkin-Elmer elemental analyzer. Powder X-ray diffraction (PXRD) measurements were recorded on a D/Max-2500 X-ray diffractometer using Cu-K $\alpha$  radiation. Thermogravimetric analyses were performed on a Labsys NETZSCH TG 209 Setaram apparatus with heating rate of 10 °C/min in Nitrogen atmosphere. Magnetic data were collected on a Quantum Design SQUID MPMS XL-7 magnetometer. Diamagnetic corrections were made with Pascal's constants for all the sample holders and constituent atoms.

**Synthesis of [TbCd<sub>2</sub>(PIDC)(HPIDC)(H<sub>2</sub>O)<sub>5</sub>Cl<sub>2</sub>] $\cdot$ 3H<sub>2</sub>O (1):** A mixture of H<sub>3</sub>PyIDC (0.0126 g, 0.05 mmol), TbCl<sub>3</sub> $\cdot$ 6H<sub>2</sub>O (0.0371 g, 0.1 mmol), CdCl<sub>2</sub> (0.0456 g, 0.2 mmol), LiOH (0.0042 g, 0.1 mmol), 4 mL H<sub>2</sub>O and 1 mL CH<sub>3</sub>OH were sealed into a 25 mL Teflon-lined Parr and heated to 120°C for 72 h under autogenously pressure. After cooling to room temperature at a rate of 2 °C/h, long strip flavescens crystals suitable for X-ray diffraction analysis were collected, washed with water, and dried in air. Yield: 65% based on Tb. Elemental analysis found (Calcd.) for C<sub>20</sub>H<sub>25</sub>Cd<sub>2</sub>Cl<sub>2</sub>TbN<sub>6</sub>O<sub>16</sub>: C 22.78 (22.66), H 1.81 (2.37), N 7.97 (7.93).

**[DyCd<sub>2</sub>(PIDC)(HPIDC)(H<sub>2</sub>O)<sub>5</sub>Cl<sub>2</sub>] $\cdot$ 3H<sub>2</sub>O (2)** were synthesized by a similar method as **1** using DyCl<sub>3</sub> $\cdot$ 6H<sub>2</sub>O instead of TbCl<sub>3</sub> $\cdot$ 6H<sub>2</sub>O. Yield: 68% based on Dy. Elemental analysis found (Calcd.) for C<sub>20</sub>H<sub>25</sub>Cd<sub>2</sub>Cl<sub>2</sub>DyN<sub>6</sub>O<sub>16</sub>: C 22.71(22.58), H 1.81(2.37), N 7.94 (7.90).

The magnetic-site dilution sample **{[Dy<sub>0.035</sub>Y<sub>0.965</sub>Cd<sub>2</sub>(PIDC)(HPIDC)(H<sub>2</sub>O)<sub>5</sub>Cl<sub>2</sub>] $\cdot$ 3H<sub>2</sub>O}<sub>n</sub> (3)** was obtained by adding DyCl<sub>3</sub> $\cdot$ 6H<sub>2</sub>O and YCl<sub>3</sub> $\cdot$ 6H<sub>2</sub>O (molar ratio of 1:30) together in the same synthesis condition of **2**. The phase purity was checked by PXRD (Fig. S1). The molar ratio of Dy:

Y was 1:27.57 by ICP analysis. Elemental analysis found (Calcd.) for  $C_{20}H_{25}Cd_2Cl_2Dy_{0.035}Y_{0.965}N_6O_{16}$ : C 24.27 (24.20), H 2.53 (2.54), N 8.28 (8.47).

## Crystallographic Studies

Crystallographic data of **1** and **2** were collected on an Oxford Supernova Single Crystal Diffractometer, which was equipped with graphite monochromatic Mo-K $\alpha$  radiation ( $\lambda = 0.71073$  Å). Structures were solved by direct methods and refined by full-matrix least-squares techniques on  $F^2$  with the *SHELXS-97* and *SHELXL-97* program package.<sup>1</sup> Anisotropic thermal parameters were assigned to all non-hydrogen atoms. The formulas were identified by combining single-crystal structure, element analysis and thermogravimetric analysis. The crystallographic data for **1** and **2** are listed in Table S3. CCDC 1033271 and 1033270 for **1** and **2** contains the supplementary crystallographic data for this paper. The data can be obtained free of charge from the Cambridge Data Centre ([www.ccdc.cam.ac.uk/data\\_request/cif](http://www.ccdc.cam.ac.uk/data_request/cif)).

Ref S1. M. Sheldrick, *Acta Cryst.*, 2008, **A64**, 112 – 122.

**Table S1** SHAPE Analysis of Dy<sup>III</sup> cation in **2**.<sup>a</sup>

| Label    | SHAPE                                      | Symmetry        | Distortion |
|----------|--------------------------------------------|-----------------|------------|
| OP-8     | Octagon                                    | D <sub>8h</sub> | 29.557     |
| HPY-8    | Heptagonal pyramid                         | C <sub>7v</sub> | 23.435     |
| HBPY-8   | Hexagonal bipyramid                        | D <sub>6h</sub> | 15.236     |
| CU-8     | Cube                                       | O <sub>h</sub>  | 8.463      |
| SAPR-8   | Square antiprism                           | D <sub>4d</sub> | 0.526      |
| TDD-8    | Triangular dodecahedron                    | D <sub>2d</sub> | 1.737      |
| JGBF-8   | Johnson gyrobifastigium J26                | D <sub>2d</sub> | 15.308     |
| JETBPY-8 | Johnson elongated triangular bipyramid J14 | D <sub>3h</sub> | 26.742     |
| JBTPR-8  | Biaugmented trigonal prism J50             | C <sub>2v</sub> | 2.804      |
| BTPR-8   | Biaugmented trigonal prism                 | C <sub>2v</sub> | 2.330      |
| JSD-8    | Snub diphonoid J84                         | D <sub>2d</sub> | 4.657      |
| TT-8     | Triakis tetrahedron                        | T <sub>d</sub>  | 9.288      |
| ETBPY-8  | Elongated trigonal bipyramid               | D <sub>3h</sub> | 21.685     |

<sup>a</sup> (a) SHAPE, version 2.0; Continuous Shape Measures Calculation; Electronic Structure Group, Universitat de Barcelona: Barcelona, Spain, 2010. (b) D. Casanova, M. Liunell, P. Alemany, S. Alvarez, *Chem. Eur. J.*, 2005, **11**, 1479 – 1494. D<sub>4d</sub> symmetry was suggested by the calculation with the minimum distortion value.

**Table S2** Structural Parameters of the Lanthanide Coordination Sphere in **2**.

|                 |          |          |          |          |          |          |          |          |
|-----------------|----------|----------|----------|----------|----------|----------|----------|----------|
| $\Phi$          | 45.4     | 45.6     | 38.9     | 53.2     | 35.7     | 54.4     | 39.5     | 47.4     |
| $\alpha$        | 60.4     | 53.1     | 58.4     | 59.5     | 57.3     | 53.1     | 58.1     | 58.1     |
| d <sub>in</sub> | 2.855(9) | 2.737(9) | 2.694(9) | 2.875(9) | 2.813(9) | 2.703(9) | 2.828(9) | 2.863(9) |
| d <sub>pp</sub> | 2.538(2) |          |          |          |          |          |          |          |

**Table S3** Crystal data and structural refinements for **1** and **2**.

|                                                                 | <b>1</b>                                                                                         | <b>2</b>                                                                                         |
|-----------------------------------------------------------------|--------------------------------------------------------------------------------------------------|--------------------------------------------------------------------------------------------------|
| formula                                                         | C <sub>20</sub> H <sub>25</sub> Cd <sub>2</sub> Cl <sub>2</sub> TbN <sub>6</sub> O <sub>16</sub> | C <sub>20</sub> H <sub>25</sub> Cd <sub>2</sub> Cl <sub>2</sub> DyN <sub>6</sub> O <sub>16</sub> |
| <i>M</i> / g mol <sup>-1</sup>                                  | 1060.08                                                                                          | 1063.66                                                                                          |
| cryst syst                                                      | monoclinic                                                                                       | monoclinic                                                                                       |
| space group                                                     | <i>Cc</i>                                                                                        | <i>Cc</i>                                                                                        |
| <i>a</i> / Å                                                    | 12.5247(5)                                                                                       | 12.5087(11)                                                                                      |
| <i>b</i> / Å                                                    | 32.2184(16)                                                                                      | 32.165(2)                                                                                        |
| <i>c</i> / Å                                                    | 7.6101(5)                                                                                        | 7.6022(5)                                                                                        |
| <i>α</i> / deg                                                  | 90                                                                                               | 90                                                                                               |
| <i>β</i> / deg                                                  | 98.856(4)                                                                                        | 98.833(7)                                                                                        |
| <i>γ</i> / deg                                                  | 90                                                                                               | 90                                                                                               |
| <i>V</i> / Å <sup>3</sup>                                       | 3034.3(3)                                                                                        | 3022.4(4)                                                                                        |
| <i>Z</i>                                                        | 4                                                                                                | 4                                                                                                |
| reflns collected                                                | 5955                                                                                             | 5854                                                                                             |
| unique reflns                                                   | 3624                                                                                             | 4031                                                                                             |
| <i>R</i> <sub>1</sub> <sup>a</sup> [ <i>I</i> > 2σ( <i>I</i> )] | 0.0321                                                                                           | 0.0235                                                                                           |
| <i>wR</i> <sub>2</sub> <sup>b</sup> (all data)                  | 0.0683                                                                                           | 0.0622                                                                                           |
| GOF on <i>F</i> <sup>2</sup>                                    | 1.027                                                                                            | 1.108                                                                                            |

**Table S4** Selected bond lengths (Å) and bond angles (deg) for **2**

|                    |            |                       |            |
|--------------------|------------|-----------------------|------------|
| Dy(1)-O(10)#1      | 2.370(5)   | O(4)-Dy(1)-O(1)       | 137.3(2)   |
| Dy(1)-O(6)         | 2.350(5)   | O(4)-Dy(1)-O(7)       | 112.9(2)   |
| Dy(1)-O(7)         | 2.370(6)   | O(4)-Dy(1)-O(2)       | 72.5(2)    |
| Dy(1)-O(2)         | 2.348(6)   | O(4)-Dy(1)-O(3)       | 76.8(2)    |
| Dy(1)-O(3)         | 2.371(5)   | O(4)-Dy(1)-O(11)#1    | 78.18(16)  |
| Dy(1)-O(4)         | 2.273(5)   | O(4)-Dy(1)-O(1)       | 137.3(2)   |
| Dy(1)-O(11)#1      | 2.368(6)   | O(11)#1-Dy(1)-O(10)#1 | 74.03(19)  |
| Dy(1)-O(1)         | 2.349(6)   | O(11)#1-Dy(1)-O(3)    | 72.8(2)    |
| Cd(1)-O(12)        | 2.216(5)   | O(1)-Dy(1)-O(6)       | 78.0(2)    |
| Cd(1)-N(2)#4       | 2.240(6)   | O(1)-Dy(1)-O(7)       | 87.99(18)  |
| Cd(1)-O(5) #4      | 2.364(5)   | O(1)-Dy(1)-O(3)       | 145.9(2)   |
| Cd(1)-O(13)        | 2.373(6)   | O(1)-Dy(1)-O(11)#1    | 110.5(2)   |
| Cd(1)-Cl(1)        | 2.446(2)   | N(1)-Cd(2)-O(8)       | 71.0(2)    |
| Cd(2)-N(1)         | 2.313(6)   | N(1)-Cd(2)-N(6)       | 80.6(2)    |
| Cd(2)-O(8)         | 2.358(5)   | N(1)-Cd(2)-Cl(2)#3    | 149.79(16) |
| Cd(2)-O(9)         | 2.355(6)   | N(1)-Cd(2)-O(9)       | 108.6(2)   |
| Cd(2)-N(6)         | 2.363(6)   | O(8)-Cd(2)-N(6)       | 108.9(2)   |
| Cd(2)-Cl(2)        | 2.5347(19) | O(8)-Cd(2)-Cl(2)      | 96.90(14)  |
| Cd(2)-Cl(2)#3      | 2.6120(19) | O(8)-Cd(2)-O(9)       | 178.20(19) |
| O(6)-Dy(1)-O(10)#1 | 136.35(17) | N(6)-Cd(2)-Cl(2)      | 153.97(16) |

|                    |            |                    |            |
|--------------------|------------|--------------------|------------|
| O(6)-Dy(1)-O(7)    | 70.0(2)    | N(6)-Cd(2)-Cl(2A)  | 86.90(16)  |
| O(6)-Dy(1)-O(3)    | 118.31(19) | Cl(2)-Cd(2)-Cl(2A) | 98.05(2)   |
| O(6)-Dy(1)-O(11)#1 | 147.5(2)   | N(2)#4-Cd(1)-Cl(1) | 106.15(18) |
| O(7)-Dy(1)-O(10)#1 | 78.8(2)    | N(2)#4-Cd(1)-O(13) | 105.5(2)   |
| O(7)-Dy(1)-O(3)    | 72.2(2)    | N(2)-Cd(1)-O(5)#4  | 73.5(2)    |
| O(7)-Dy(1)-O(11)#1 | 139.3(2)   | O(13)-Cd(1)-Cl(1)  | 101.41(16) |
| O(2)-Dy(1)-O(10)#1 | 116.51(19) | O(5)#4-Cd(1)-Cl(1) | 100.20(14) |
| O(2)-Dy(1)-O(6)    | 78.56(19)  | O(5)#4-Cd(1)-O(13) | 157.75(19) |
| O(2)-Dy(1)-O(7)    | 144.8(2)   | O(12)-Cd(1)-N(2)#4 | 128.9(2)   |
| O(2)-Dy(1)-O(3)    | 139.52(18) | O(12)-Cd(1)-Cl(1)  | 119.41(16) |
| O(2)-Dy(1)-O(11)#1 | 75.6(2)    | O(12)-Cd(1)-O(13)  | 88.1(2)    |
| O(2)-Dy(1)-O(1)    | 69.8(2)    | O(12)-Cd(1)-O(5)#4 | 76.7(2)    |
| O(3)-Dy(1)-O(10)#1 | 78.0(2)    |                    |            |
| O(4)-Dy(1)-O(10)#1 | 146.8(2)   |                    |            |
| O(4)-Dy(1)-O(6)    | 75.5(2)    |                    |            |

Symmetry operation code: #1 1+X, +Y, +Z; #3 +X, 1-Y, 1/2+Z; #4 -1/2+X, 3/2-Y, 1/2+Z.

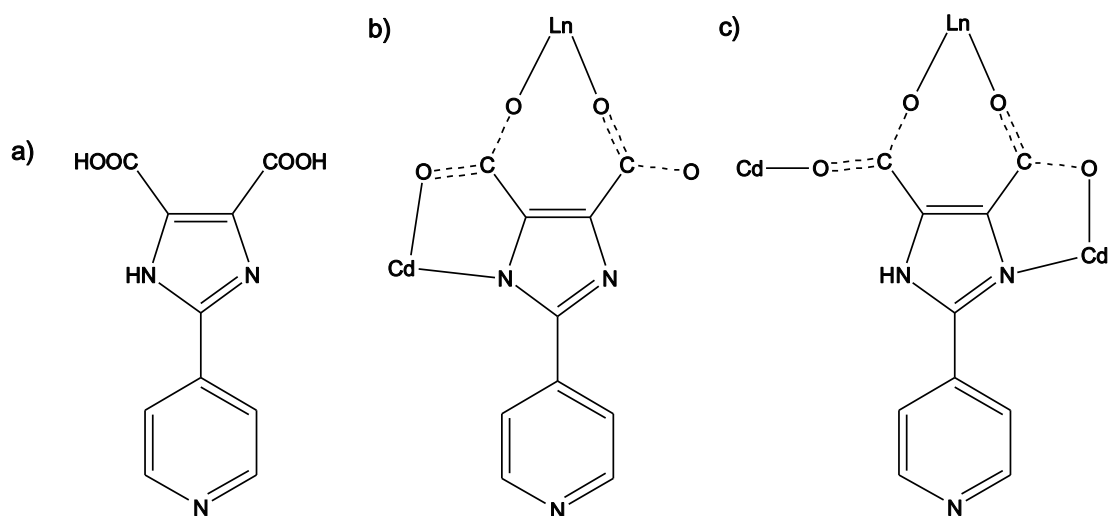

**Scheme S1** The structural formula of H<sub>3</sub>PIDC (a) and the coordination modes of PIDC<sup>3-</sup> (b) and HPIDC<sup>2-</sup> (c) in **1** and **2**.

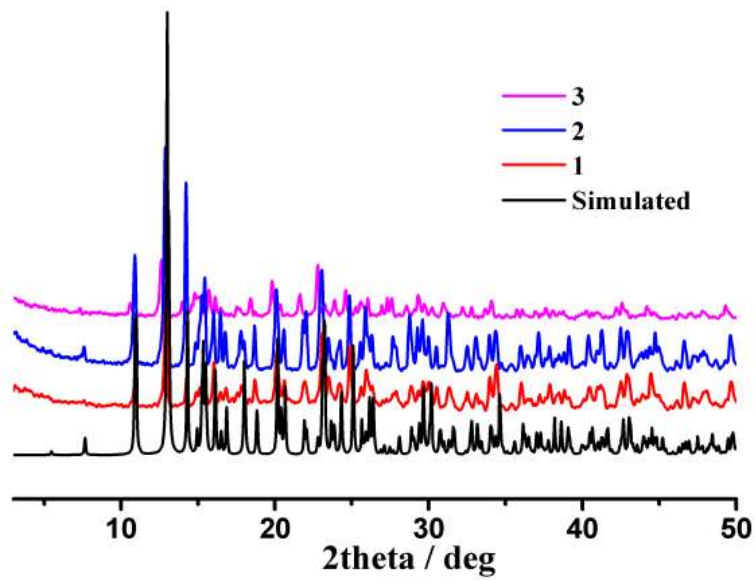

Fig. S1 Simulated and measured PXRD of 1-3.

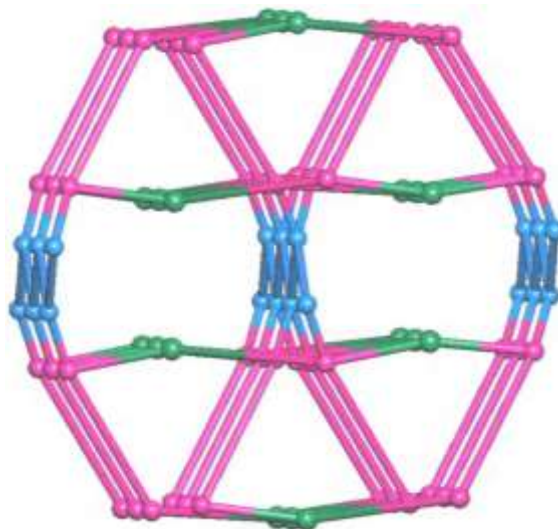

Fig. S2 View of the 3, 4, 4-connected topological structure.

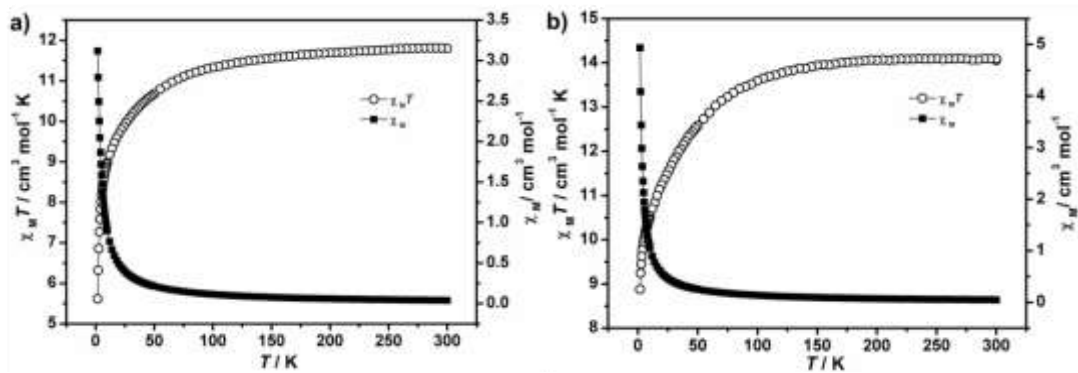

Fig. S3 Temperature dependence of  $\chi_M$  (■) and  $\chi_M T$  (○) of 1 (a) and 2 (b).

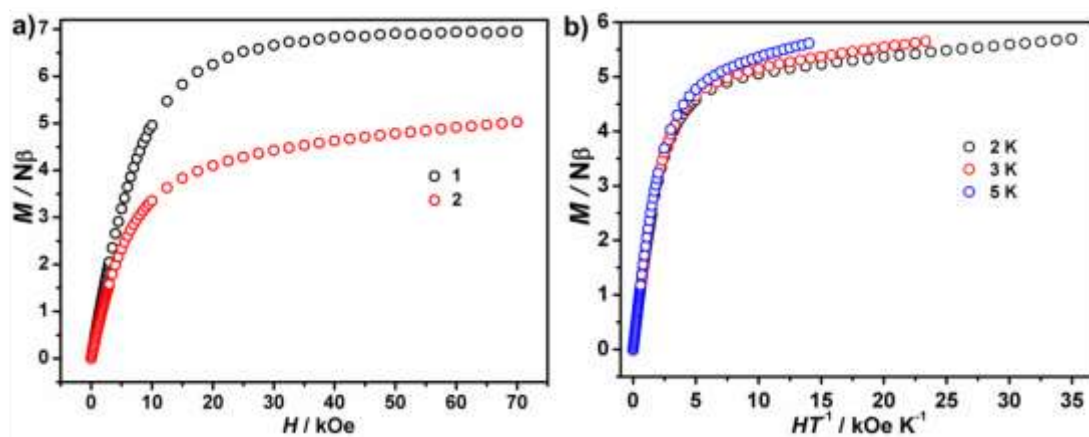

**Fig. S4** Field dependence of the magnetizations of **1** and **2** (a) and plot of  $M$  vs.  $HT^{-1}$  at 2, 3 and 5 K for **2** (b).

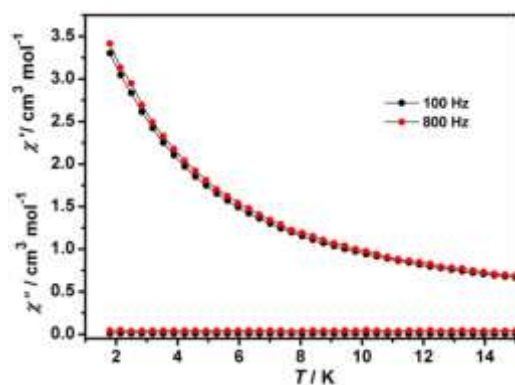

**Fig. S5** Temperature dependence of the ac susceptibilities of **1** at zero dc field.

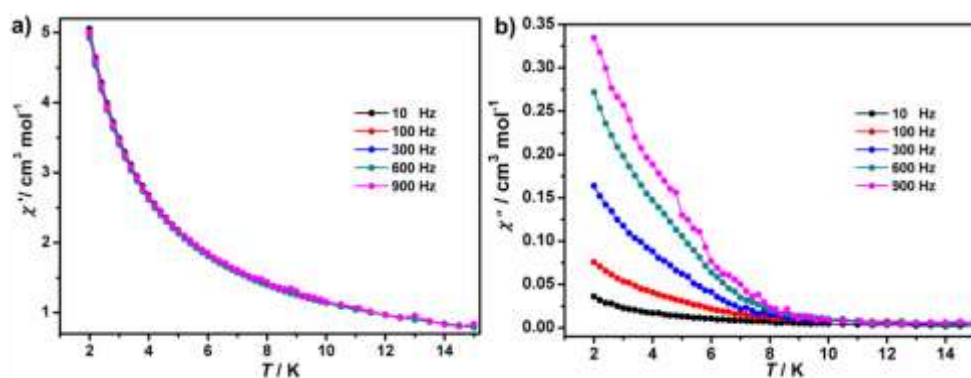

**Fig. S6** Temperature dependence of the in-phase ( $\chi'$ ) and out-of-phase ( $\chi''$ ) ac susceptibilities of **2** at zero dc field.

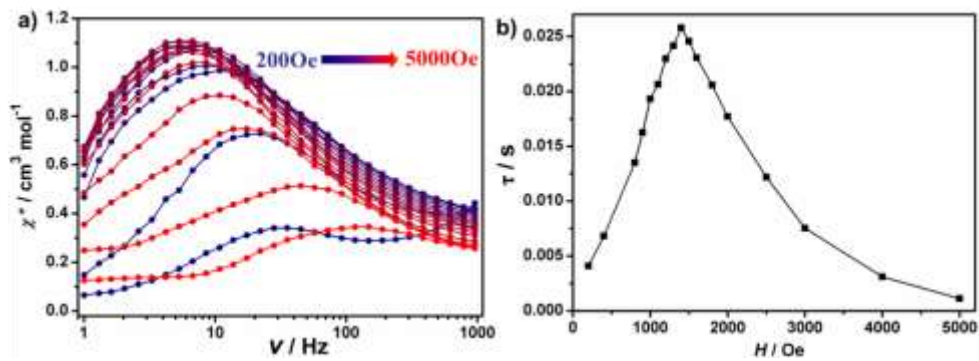

**Fig. S7** a) Frequency dependence of the out-of-phase ( $\chi''$ ) ac susceptibility components for **2** measured at 2 K with different dc fields. b) Field dependence of the relaxation time from  $\chi''$  vs.  $\nu$  data.

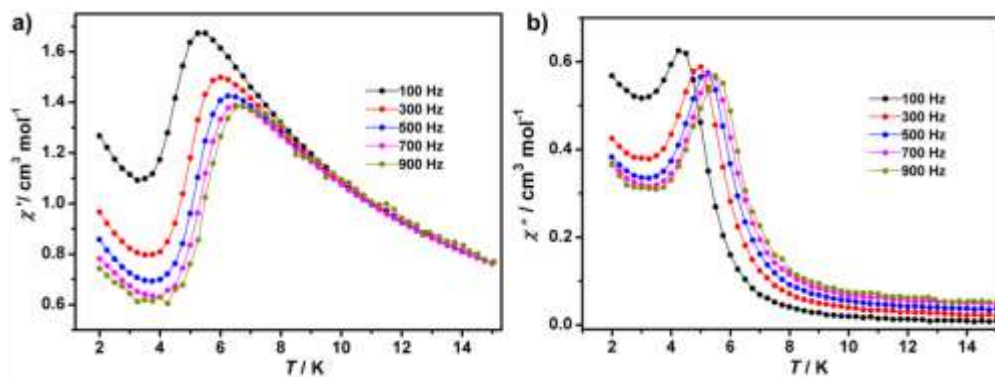

**Fig. S8** Temperature dependence of the in-phase ( $\chi'$ ) and out-of-phase ( $\chi''$ ) ac susceptibilities of **2** at the indicated field of 1400 Oe.

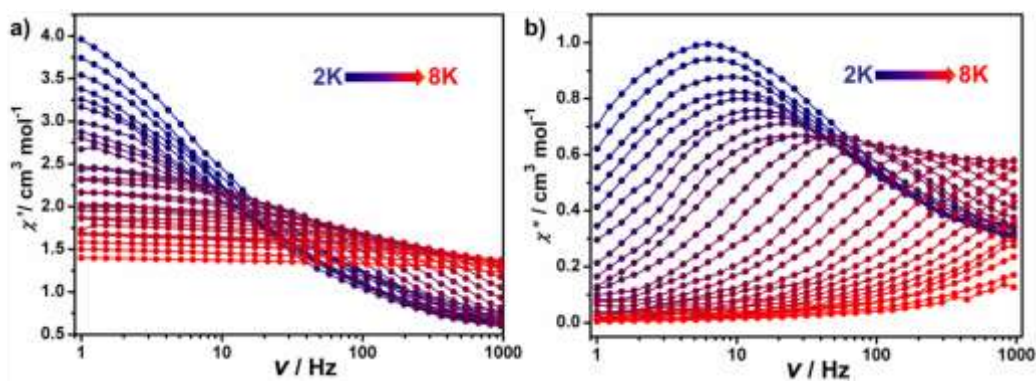

**Fig. S9** Frequency dependence of the in-phase ( $\chi'$ ) and out-of-phase ( $\chi''$ ) ac susceptibilities of **2** at the indicated field of 1400 Oe.



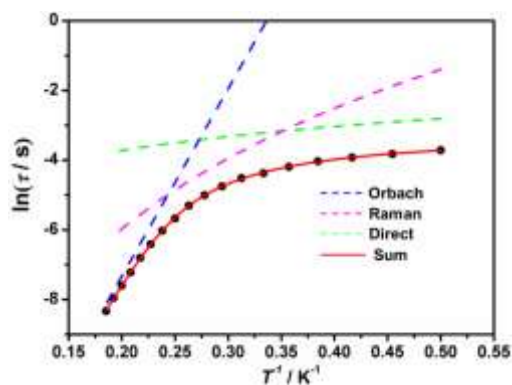

**Fig. S10** Plot of  $\ln(\tau)$  versus  $1/T$  for **2**, obtained under an applied field of 1400 Oe. The red line represents the fit to the experimental data using Eq. 1 (main text). Blue, green and pink dashed lines represent individual Orbach, direct and Raman fits, respectively.

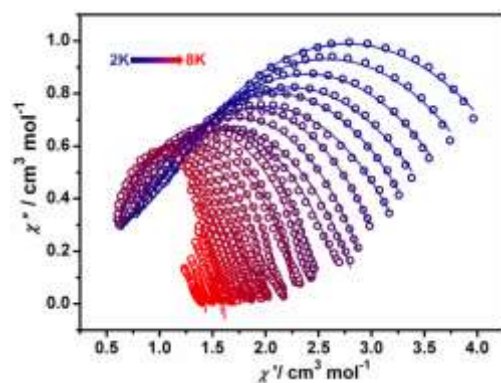

**Fig. S11** Cole-Cole diagram for **2** extracted by plotting  $\chi''$  vs.  $\chi'$  and fitted by a generalized Debye model.

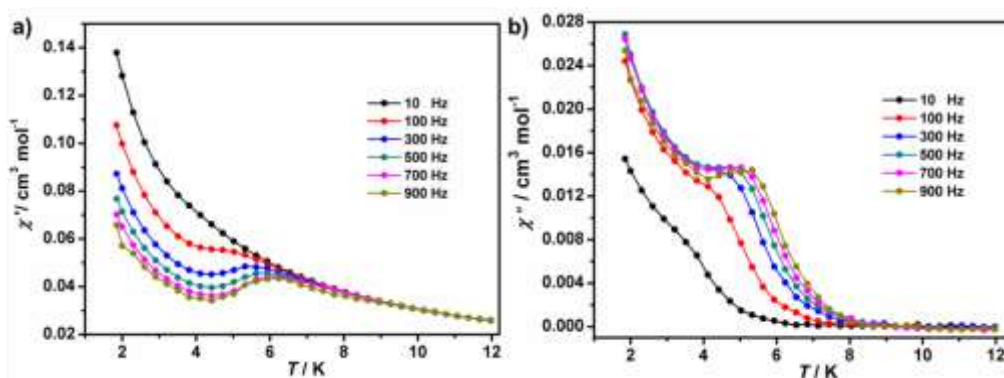

**Fig. S12** Temperature dependence of the in-phase ( $\chi'$ ) and out-phase ( $\chi''$ ) AC susceptibilities of **3** at zero dc field.

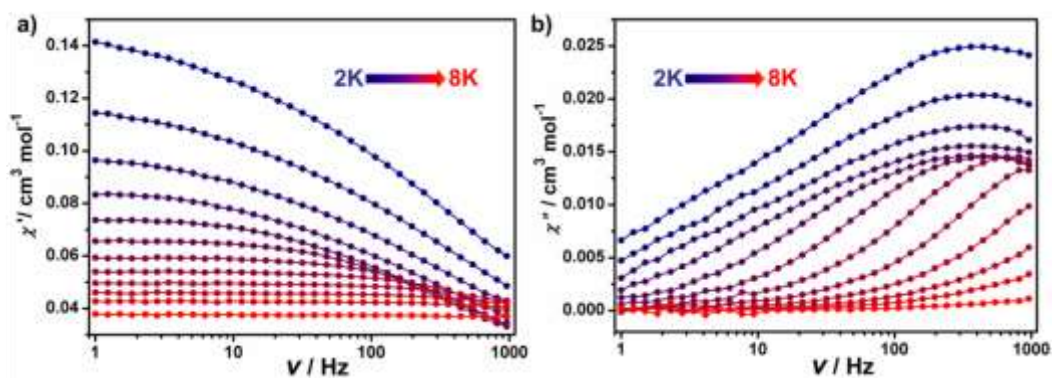

**Fig. S13** Frequency dependence of the in-phase ( $\chi'$ ) and out-of-phase ( $\chi''$ ) ac susceptibilities of **3** at zero dc field.

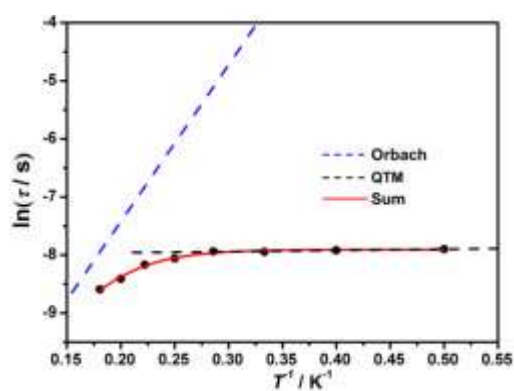

**Fig. S14** Plot of  $\ln(\tau)$  versus  $1/T$  for **3**, obtained under an dc field of 0 Oe. The red line represents the fit to the experimental data using Eq. 1 (main text). Blue and black dashed lines represent individual Orbach and QTM fits, respectively.

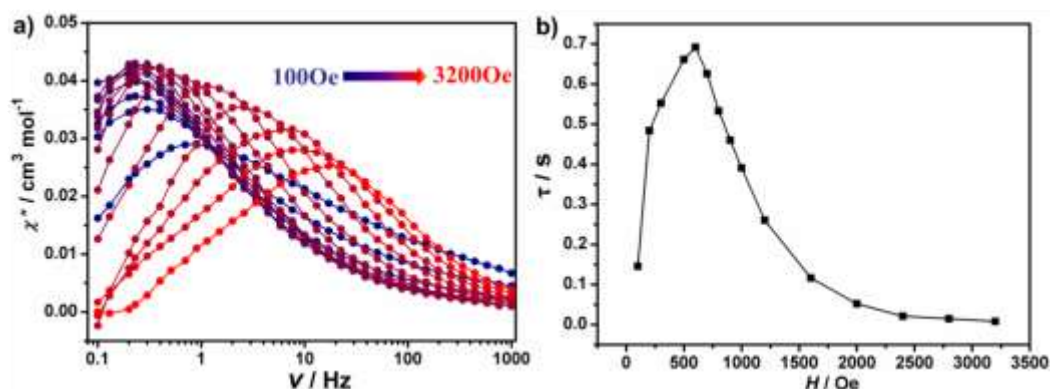

**Fig. S15** a) Frequency dependence of the out-of-phase ( $\chi''$ ) ac susceptibility components for **3** measured at 2 K with different dc fields. b) Field dependence of the relaxation time.

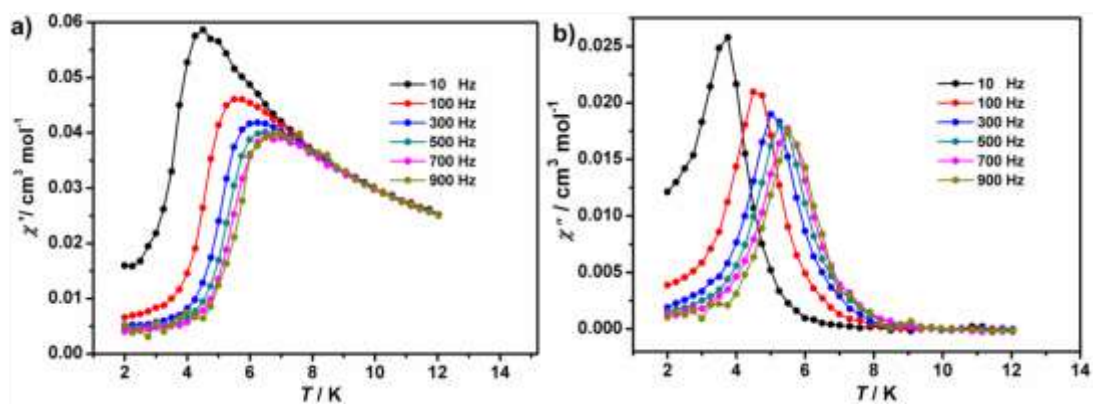

**Fig. S16** Temperature dependence of the in-phase ( $\chi'$ ) and out-phase ( $\chi''$ ) AC susceptibilities of **3** at the indicated field of 600 Oe.

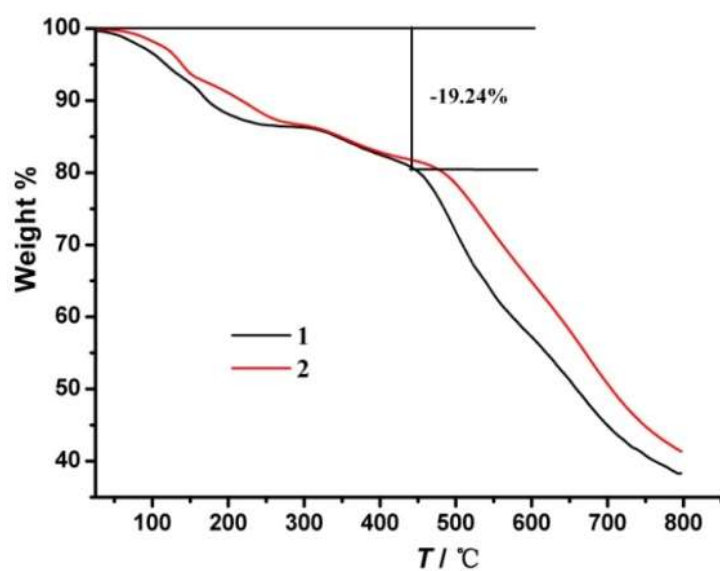

**Fig. S17** TGA of **1** and **2**.

**Table S5** The parameters of the Cole-Cole plots fitted by the general Debye models.

| 2 (1400 Oe dc field) |          |          |          |              |          |          |          |              |          |          |          |
|----------------------|----------|----------|----------|--------------|----------|----------|----------|--------------|----------|----------|----------|
| <i>T</i> / K         | $\chi_0$ | $\chi_1$ | $\alpha$ | <i>T</i> / K | $\chi_0$ | $\chi_1$ | $\alpha$ | <i>T</i> / K | $\chi_0$ | $\chi_1$ | $\alpha$ |
| 2.0                  | 0.535    | 5.001    | 0.460    | 3.8          | 0.335    | 2.790    | 0.377    | 5.6          | 0.268    | 2.052    | 0.249    |
| 2.2                  | 0.547    | 4.616    | 0.454    | 4.0          | 0.384    | 2.531    | 0.280    | 5.8          | 0.076    | 2.005    | 0.305    |
| 2.4                  | 0.535    | 4.244    | 0.440    | 4.2          | 0.403    | 2.448    | 0.271    | 6.0          | 0.080    | 1.925    | 0.301    |
| 2.6                  | 0.437    | 3.998    | 0.449    | 4.4          | 0.397    | 2.306    | 0.243    | 6.2          | 0        | 1.869    | 0.302    |
| 2.8                  | 0.468    | 3.713    | 0.419    | 4.6          | 0.293    | 2.304    | 0.300    | 6.4          | 0        | 1.795    | 0.285    |
| 3.0                  | 0.427    | 3.544    | 0.431    | 4.8          | 0.322    | 2.143    | 0.247    | 6.6          | 0        | 1.739    | 0.287    |
| 3.2                  | 0.401    | 3.267    | 0.394    | 5.0          | 0.268    | 2.052    | 0.243    | 6.8          | 0        | 1.701    | 0.313    |
| 3.4                  | 0.442    | 3.034    | 0.365    | 5.2          | 0.076    | 2.005    | 0.300    | 7.0          | 0        | 1.646    | 0.303    |
| 3.6                  | 0.401    | 2.908    | 0.380    | 5.4          | 0.080    | 1.925    | 0.247    | 7.5          | 0        | 1.420    | 0.145    |

  

| 3 (600 Oe dc field) |          |          |          |              |          |          |          |              |          |          |          |
|---------------------|----------|----------|----------|--------------|----------|----------|----------|--------------|----------|----------|----------|
| <i>T</i> / K        | $\chi_0$ | $\chi_1$ | $\alpha$ | <i>T</i> / K | $\chi_0$ | $\chi_1$ | $\alpha$ | <i>T</i> / K | $\chi_0$ | $\chi_1$ | $\alpha$ |
| 2.0                 | 0.005    | 0.161    | 0.402    | 3.8          | 0.005    | 0.077    | 0.198    | 5.6          | 0.010    | 0.052    | 0.137    |
| 2.2                 | 0.004    | 0.147    | 0.406    | 4.0          | 0.005    | 0.074    | 0.227    | 5.8          | 0.011    | 0.050    | 0.137    |
| 2.4                 | 0.004    | 0.137    | 0.404    | 4.2          | 0.005    | 0.070    | 0.219    | 6.0          | 0.016    | 0.047    | 0.117    |
| 2.6                 | 0.005    | 0.125    | 0.385    | 4.4          | 0.005    | 0.067    | 0.215    | 6.2          | 0.022    | 0.047    | 0.115    |
| 2.8                 | 0.004    | 0.117    | 0.378    | 4.6          | 0.004    | 0.064    | 0.225    | 6.4          | 0.023    | 0.046    | 0.136    |
| 3.0                 | 0.004    | 0.106    | 0.347    | 4.8          | 0.005    | 0.059    | 0.144    | 6.6          | 0.025    | 0.044    | 0.323    |

---

|     |       |       |       |     |       |       |       |     |       |       |       |
|-----|-------|-------|-------|-----|-------|-------|-------|-----|-------|-------|-------|
| 3.2 | 0.004 | 0.097 | 0.310 | 5.0 | 0.006 | 0.058 | 0.139 | 6.8 | 0.027 | 0.043 | 0.160 |
| 3.4 | 0.005 | 0.089 | 0.272 | 5.2 | 0.007 | 0.055 | 0.129 | 7.0 | 0.017 | 0.043 | 0.259 |
| 3.6 | 0.004 | 0.084 | 0.263 | 5.4 | 0.009 | 0.054 | 0.139 | 7.5 | 0.03  | 0.04  | 0.182 |
